# Supplementary material for: The Pan-Immune-Inflammation-Value Predicts the Survival of Patients with Human Epidermal Growth Factor Receptor 2 (HER2)—Positive Advanced Breast Cancer Treated with First-Line Taxane-Trastuzumab-Pertuzumab
Source: MDPI journal article supplement (doi:10.3390/cancers13081964), 2021-04-19
Supplement: s1 [file s1]

## SUPPLEMENTARY MATERIAL

**Table S1 – Patient characteristics according to PIV category**

|                                   | Low PIV (N=28) | High PIV (N=29) | Total (N=57) | p            |
|-----------------------------------|----------------|-----------------|--------------|--------------|
| AGE                               |                |                 |              |              |
| Median (Range)                    | 53 (36 -78)    | 54 (27 -77)     | 53 (26-78)   | 0.782*       |
| <50                               | 8 (28.6%)      | 11 (37.9%)      | 19 (33.3%)   | 0.458        |
| ≥50                               | 20 (71.4%)     | 18 (62.1%)      | 38 (66.7%)   |              |
| <i>De novo</i> metastatic disease |                |                 |              |              |
| no                                | 15 (53.6%)     | 19 (65.5%)      | 34 (59.6%)   | 0.362        |
| yes                               | 13 (46.4%)     | 10 (34.5%)      | 23 (40.4%)   |              |
| Number of metastatic sites        |                |                 |              |              |
| ≤2                                | 17 (60.7%)     | 13 (44.8%)      | 30 (52.6%)   | 0.234        |
| >2                                | 11 (39.3%)     | 16 (55.2%)      | 27 (47.4%)   |              |
| Visceral metastases               |                |                 |              |              |
| no                                | 17 (60.7%)     | 10 (34.5%)      | 27 (47.4%)   | <b>0.049</b> |
| yes                               | 11 (39.3%)     | 19 (65.5%)      | 30 (52.6%)   |              |
| Brain metastases                  |                |                 |              |              |
| no                                | 27 (96.4%)     | 22 (75.9%)      | 49 (86.0%)   | <b>0.027</b> |
| yes                               | 1 (3.6%)       | 7 (24.1%)       | 8 (14.0%)    |              |
| HR status**                       |                |                 |              |              |
| no                                | 9 (32.1%)      | 11 (37.9%)      | 20 (35.1%)   | 0.650        |
| yes                               | 19 (67.9%)     | 18 (62.1%)      | 37 (64.9%)   |              |
| Previous trastuzumab              |                |                 |              |              |
| no                                | 18 (64.3%)     | 17 (58.6%)      | 35 (61.4%)   | 0.663        |
| yes                               | 10 (35.7%)     | 12 (41.4%)      | 22 (38.6%)   |              |
| Previous anthracyclines           |                |                 |              |              |
| no                                | 17 (60.7%)     | 13 (44.8%)      | 30 (52.6%)   | 0.234        |
| yes                               | 11 (39.3%)     | 16 (55.2%)      | 27 (47.4%)   |              |
| Previous taxanes                  |                |                 |              |              |
| no                                | 17 (60.7%)     | 14 (48.3%)      | 31 (54.4%)   | 0.350        |
| yes                               | 11 (39.3%)     | 15 (51.7%)      | 26 (45.6%)   |              |
| Type of chemotherapy regimen      |                |                 |              |              |
| Docetaxel                         | 24 (85.7%)     | 20 (69.0%)      | 44 (77.2%)   | 0.135        |
| Paclitaxel                        | 4 (14.3%)      | 9 (31.0%)       | 13 (22.8%)   |              |

Data are presented as n (%) except where otherwise noted. The p value of the  $\chi^2$  test assessing the association between each characteristic and the PIV category is indicated in the right column of the table, except where otherwise noted.\* Wilcoxon test.

\*\*Defined positive if >1% of tumor cells express hormone receptors. Abbreviations: HR, hormone receptors; PIV: Pan-Immune - Inflammation Value

**Table S2 - Association between PIV and other peripheral blood parameters (as dichotomous variables)**

|      | Low PIV (N=28) | High PIV (N=29) | Total (N=57) | p                 |
|------|----------------|-----------------|--------------|-------------------|
| PLR  |                |                 |              |                   |
| low  | 19 (67.9%)     | 9 (31.0%)       | 28 (49.1%)   | <b>0.006</b>      |
| high | 9 (32.1%)      | 20 (69.0%)      | 29 (50.9%)   |                   |
| MLR  |                |                 |              |                   |
| low  | 26 (92.9%)     | 12 (41.4%)      | 38 (66.7%)   | <b>&lt; 0.001</b> |
| high | 2 (7.1%)       | 17 (58.6%)      | 19 (33.3%)   |                   |
| NLR  |                |                 |              |                   |
| low  | 22 (78.6%)     | 6 (20.7%)       | 28 (49.1%)   | <b>&lt; 0.001</b> |
| high | 6 (21.4%)      | 23 (79.3%)      | 29 (50.9%)   |                   |

Data are presented as n (%). The p value of the  $\chi^2$  test assessing the association between each characteristic and the PIV category is indicated in the right column of the table. Abbreviations: PIV: Pan-Immune -Inflammation Value; MLR: monocyte to lymphocyte ratio; PLR: platelet to lymphocyte ratio; NLR: neutrophil to lymphocyte ratio.

Figure S1 - Association between peripheral blood parameters (as continuous variables)

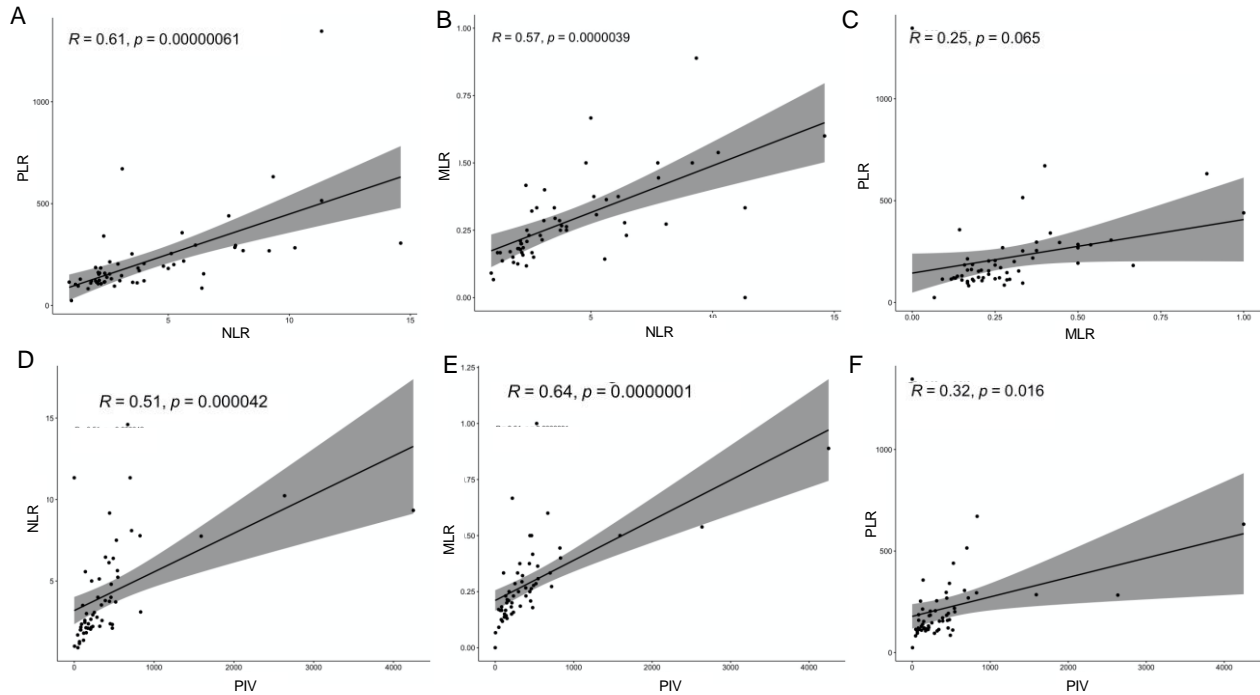

Supplementary Figure 1. Linear correlation between PLR and NLR (A), MLR and NLR (B), PLR and MLR (C); PIV and NLR (D), PIV and MLR (E), PIV and PLR (F) NLR: neutrophil to lymphocyte ratio; MLR: monocyte to lymphocyte ratio; PLR: platelet to lymphocyte ratio.

Table S3 - multivariable Cox proportional hazards model for PFS including PLR, NLR, or MLR

| Multivariable analysis     | HR (95% CI)         | p                |
|----------------------------|---------------------|------------------|
| Number of metastatic sites |                     |                  |
| ≥3 vs <3                   | 3.72 (1.46 - 9.48)  | <b>0.006</b>     |
| Visceral metastases        |                     |                  |
| yes vs no                  | 2.25 (0.96 - 5.28)  | 0.063            |
| Previous trastuzumab       |                     |                  |
| yes vs no                  | 4.42 (1.90 - 10.26) | <b>&lt;0.001</b> |
| PLR                        |                     |                  |
| high vs low                | 1.93 (0.89 - 4.18)  | 0.094            |

The p value is indicated in bold numbers when statistically significant. PLR Platelet to lymphocyte ratio

| Multivariable analysis     | HR (95% CI)        | p            |
|----------------------------|--------------------|--------------|
| Number of metastatic sites |                    |              |
| ≥3 vs <3                   | 3.62 (1.40 - 9.39) | <b>0.008</b> |
| Visceral metastases        |                    |              |
| yes vs no                  | 2.39 (1.04 - 5.47) | <b>0.040</b> |
| Previous trastuzumab       |                    |              |

|                                                                                                            |                     |                  |
|------------------------------------------------------------------------------------------------------------|---------------------|------------------|
| yes vs no                                                                                                  | 4.58 (1.95 - 10.77) | <b>&lt;0.001</b> |
| MLR                                                                                                        |                     |                  |
| high vs low                                                                                                | 1.80 (0.86 - 3.78)  | 0.119            |
| The p value is indicated in bold numbers when statistically significant. MLR monocyte to lymphocyte ratio. |                     |                  |

| Multivariable analysis                                                                                      | HR (95% CI)         | p                |
|-------------------------------------------------------------------------------------------------------------|---------------------|------------------|
| Number of metastatic sites                                                                                  |                     |                  |
| ≥3 vs <3                                                                                                    | 4.11 (1.62 - 10.42) | <b>0.003</b>     |
| Visceral metastases                                                                                         |                     |                  |
| yes vs no                                                                                                   | 2.39 (1.04 - 5.52)  | <b>0.041</b>     |
| Previous trastuzumab                                                                                        |                     |                  |
| yes vs no                                                                                                   | 4.57 (1.89 - 11.04) | <b>&lt;0.001</b> |
| NLR                                                                                                         |                     |                  |
| high vs low                                                                                                 | 1.13 (0.53 - 2.42)  | 0.757            |
| The p value is indicated in bold numbers when statistically significant. NLR neutrophil to lymphocyte ratio |                     |                  |

**Table S4 - Multivariable Cox proportional hazards model for OS including and PLR, MLR or NRL**

| Multivariable analysis                                                                                    | HR (95% CI)        | p     |
|-----------------------------------------------------------------------------------------------------------|--------------------|-------|
| Number of metastatic sites                                                                                |                    |       |
| ≥3 vs <3                                                                                                  | 1.99 (0.74 - 5.38) | 0.173 |
| Visceral metastases                                                                                       |                    |       |
| yes vs no                                                                                                 | 1.47 (0.48 - 4.47) | 0.502 |
| Brain metastases                                                                                          |                    |       |
| yes vs no                                                                                                 | 2.81 (0.90 - 8.76) | 0.075 |
| PLR                                                                                                       |                    |       |
| high vs low                                                                                               | 1.16 (0.41 - 3.30) | 0.778 |
| The p value is indicated in bold numbers when statistically significant. PLR Platelet to lymphocyte ratio |                    |       |

| Multivariable analysis                                                                                     | HR (95% CI)        | p     |
|------------------------------------------------------------------------------------------------------------|--------------------|-------|
| Number of metastatic sites                                                                                 |                    |       |
| ≥3 vs <3                                                                                                   | 1.79 (0.64 - 4.98) | 0.265 |
| Visceral metastases                                                                                        |                    |       |
| yes vs no                                                                                                  | 1.63 (0.54 - 4.92) | 0.390 |
| Brain metastases                                                                                           |                    |       |
| yes vs no                                                                                                  | 2.12 (0.66 - 6.84) | 0.210 |
| MLR                                                                                                        |                    |       |
| high vs low                                                                                                | 2.26 (0.88 - 5.84) | 0.091 |
| The p value is indicated in bold numbers when statistically significant. MLR monocyte to lymphocyte ratio. |                    |       |

| Multivariable analysis     | HR (95% CI)        | p     |
|----------------------------|--------------------|-------|
| Number of metastatic sites |                    |       |
| ≥3 vs <3                   | 1.82 (0.65 - 5.09) | 0.254 |
| Visceral metastases        |                    |       |

|                                                                                                             |                    |       |
|-------------------------------------------------------------------------------------------------------------|--------------------|-------|
| yes vs no                                                                                                   | 1.45 (0.47 - 4.44) | 0.520 |
| Brain metastases                                                                                            |                    |       |
| yes vs no                                                                                                   | 2.39 (0.74 - 7.70) | 0.145 |
| NLR                                                                                                         |                    |       |
| high vs low                                                                                                 | 1.78 (0.60 - 5.33) | 0.302 |
| The p value is indicated in bold numbers when statistically significant. NLR neutrophil to lymphocyte ratio |                    |       |

**Figure S2 – PIV as a continuous variable in patients with long vs. short PFS ( $\geq 24$  months vs.  $<24$  months, respectively)**

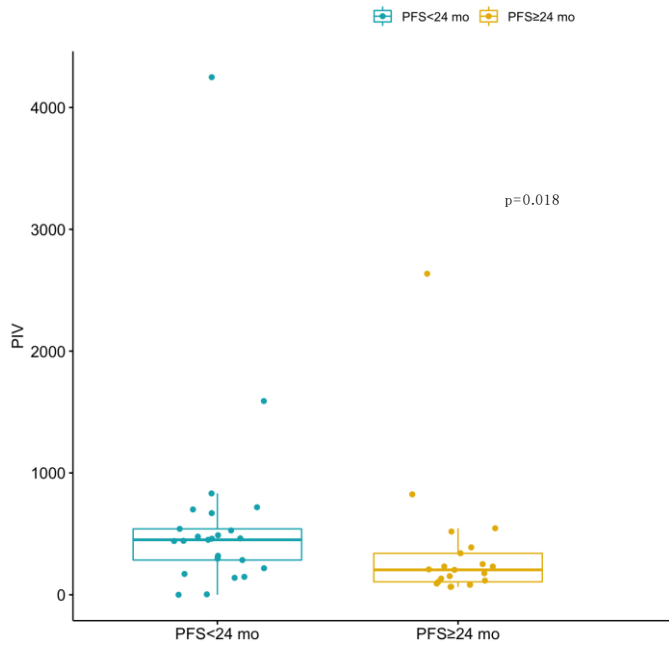

**Table S5 – PIV as a dichotomous variable (high vs. low) in patients with long vs. short PFS ( $\geq 24$  months vs.  $<24$  months, respectively)**

|      | PFS $\geq 24$ months (n=21) | PFS < 24 months (n=25) | Total (N=46) | p      |
|------|-----------------------------|------------------------|--------------|--------|
| PIV  |                             |                        |              | 0.004* |
| low  | 15 (71.4)                   | 6 (24.0)               | 21 (45.7)    |        |
| high | 6 (28.6)                    | 19 (76.0)              | 25 (54.3)    |        |

Long responder patients were those with a PFS of at least 24 months. Patient with a follow up shorter than 24 months were excluded from the analysis. Data are presented as n (%). \*  $\chi^2$  test Abbreviations: PIV: Pan-Immune -Inflammation Value.
